# FOCUS

THE JOURNAL OF LIFELONG LEARNING IN PSYCHIATRY



## *Geriatric Psychiatry*

*Guest Editor, Barry Lebowitz, Ph.D.*

### IN CLINICAL SYNTHESIS:

Psychiatric Assessment and  
Diagnosis in Older Adults

*Thomas W. Meeks, M.D.*

*Nicole Lanouette, M.D.*

*Ipsit Vahia, M.D.*

*Sharon Dawes, Ph.D.*

*Dilip V. Jeste, M.D.*

*Barry Lebowitz, Ph.D.*

Depression, Pain, and Aging

*Jordan F. Karp, M.D.*

*Charles F. Reynolds III, M.D.*

The Role of the Immune System  
in Alzheimer's Disease

*Robert M. Cohen, Ph.D., M.D.*

AND INFLUENTIAL PUBLICATIONS . . .
